# Supplementary material for: Pyk2 activates the NLRP3 inflammasome by directly phosphorylating ASC and contributes to inflammasome-dependent peritonitis
Source: PubMed Central journal article supplement (PMC5087076; doi:10.1038/srep36214), 2016-10-31
Supplement: srep36214-s1.pdf [file srep36214-s1.pdf]

## Supplementary information

### **Pyk2 activates the NLRP3 inflammasome by directly phosphorylating ASC and contributes to inflammasome-dependent peritonitis**

I-Che Chung<sup>1</sup>, Chun-Nan OuYang<sup>1</sup>, Sheng-Ning Yuan<sup>1</sup>, Hsin-Pai Li<sup>2,3,4</sup>, Jeng-Ting Chen<sup>1</sup>, Hui-Ru Shieh<sup>5</sup>, Yu-Jen Chen<sup>5,6</sup>, David M. Ojcius<sup>7</sup>, Ching-Liang Chu<sup>8</sup>, Jau-Song Yu<sup>3,9,10</sup>, Yu-Sun Chang<sup>1,3,11</sup>, Lih-Chyang Chen<sup>12,\*</sup>

<sup>1</sup>Molecular Medicine Research Center, Chang Gung University, 333 Taoyuan, Taiwan

<sup>2</sup>Department of Microbiology and Immunology, Chang Gung University, 333 Taoyuan, Taiwan

<sup>3</sup>Graduate Institute of Biomedical Sciences, Chang Gung University, 333 Taoyuan, Taiwan

<sup>4</sup>Division of Hematology-Oncology, Chang Gung Memorial Hospital at Lin-Kuo, 333 Taoyuan, Taiwan

<sup>5</sup>Department of Medical Research Mackay Memorial Hospital, 251 New Taipei City, Taiwan

<sup>6</sup>Department of Radiation Oncology, Mackay Memorial Hospital, 251 New Taipei City, Taiwan

<sup>7</sup>Department of Biomedical Sciences, University of the Pacific Arthur A. Dugoni School of Dentistry, San Francisco, CA 94103, USA

<sup>8</sup>Graduate Institute of Immunology, College of Medicine, National Taiwan University, 100 Taipei, Taiwan

<sup>9</sup>Proteomics Core Laboratory, Chang Gung University, 333 Taoyuan, Taiwan

<sup>10</sup>Liver Research Center, Chang Gung Memorial Hospital at Lin-Kou, 333 Taoyuan, Taiwan

<sup>11</sup>Department of Otolaryngology, Chang Gung Memorial Hospital at Lin-Kuo, 333 Taoyuan, Taiwan

<sup>12</sup>Department of Medicine, Mackay Medical College, 252 New Taipei City, Taiwan

\*Corresponding author: Lih-Chyang Chen, Department of Medicine, Mackay Medical College, 252 New Taipei City, Taiwan. Tel: 886-2-26360303 ext 1225, email: lihchyang@mmc.edu.tw

## **Supplementary materials and methods**

### **Lactate dehydrogenase (LDH) release assay**

LDH levels were measured in the supernatant using the LDH Cytotoxicity detection kit (TaKaRa Clontech). The assays were performed according to the manufacturer's instructions, and the red formazan product was measured at 490 nm using a SpectraMax M2 microplate reader (Molecular Devices). Measurements were performed at least in triplicate. Percent LDH release was calculated as follows:  $[(\text{LDH sample}) - (\text{LDH negative control})] / [(\text{LDH positive control}) - (\text{LDH negative control})]$ . LDH negative control for spontaneous LDH release was measured from untreated cells. LDH positive control for maximum LDH release was measured in cells lysed with 2% Triton-X-100.

### **Measurements of speck sizes**

ASC speck images were randomly acquired under confocal microscopy using a Zeiss LSM510 META laser scanning microscope (Carl Zeiss, Germany) with a 63×1.32 NA oil immersion objective. Nuclei were stained with DAPI. The largest diameters of individual specks were measured.

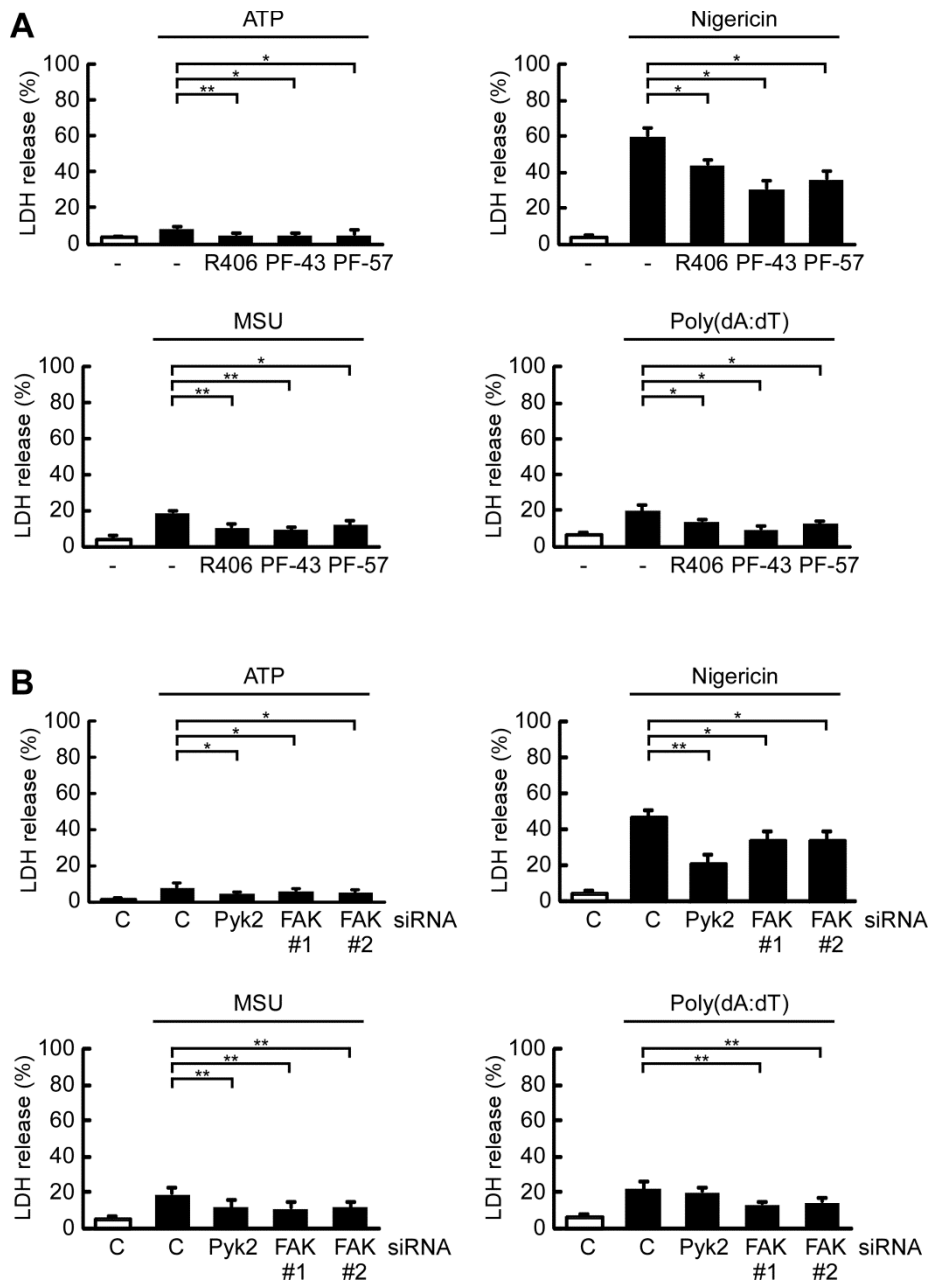

**Supplementary Figure S1. Release of LDH upon NLRP3 and AIM2 inflammasome activation.** (A) Activity assay of LDH in the culture supernatant of PMA-differentiated THP-1 cells stimulated with ATP, MSU, nigericin, or poly(dA:dT) in the presence or absence of the indicated kinase inhibitors. (B) Activity assay of LDH in the supernatant of PMA-differentiated THP-1 cells treated with Pyk2-, FAK-, or negative control (C) siRNA, followed by stimulation with ATP, MSU, nigericin, or poly(dA:dT). Two independent FAK siRNA are indicated as FAK#1 and FAK#2. Symbols: \*,  $P < 0.05$ ; and \*\*,  $P < 0.01$ . All results are presented as the mean  $\pm$  SD of three independent experiments, and were analyzed with the Student's t test.

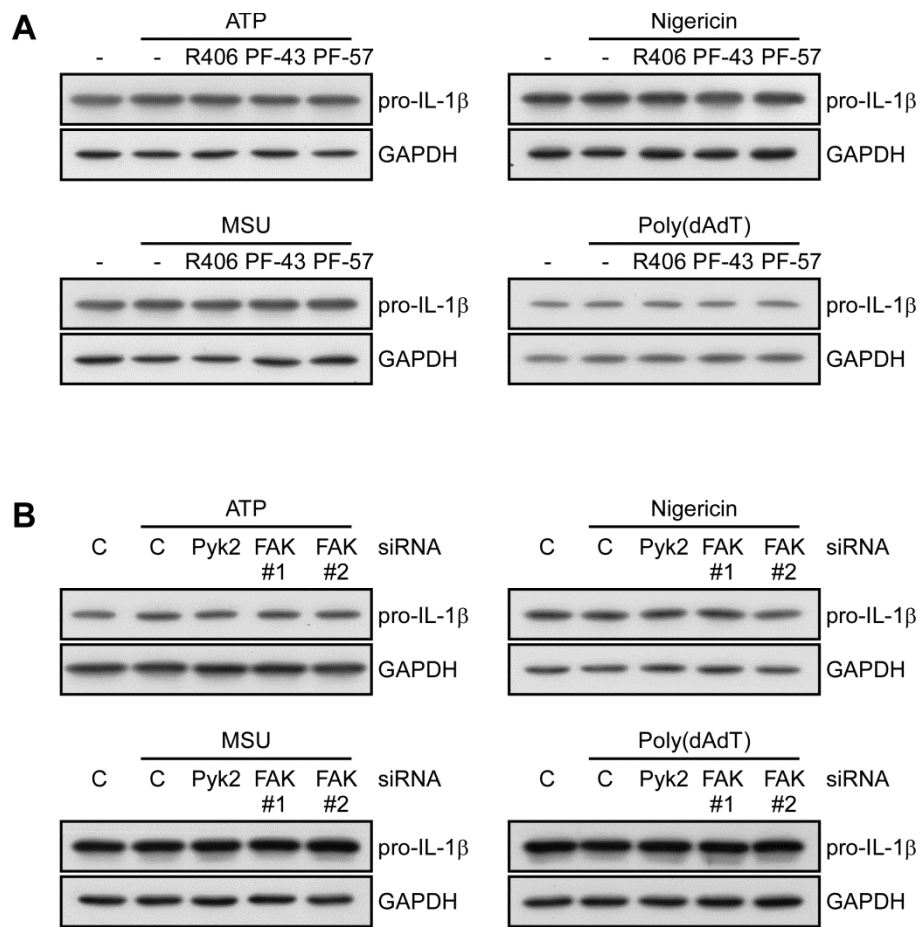

**Supplementary Figure S2. Expression of pro-IL-1 $\beta$  upon NLRP3 and AIM2 inflammasome activation.** (A) Western blotting of pro-IL-1 $\beta$  in the cell lysate of PMA-differentiated THP-1 cells stimulated with ATP, MSU, nigericin, or poly(dA:dT) in the presence or absence of the indicated kinase inhibitors. (B) Western blotting of pro-IL-1 $\beta$  in the cell lysate of PMA-differentiated THP-1 cells treated with Pyk2-, FAK-, or negative control (C) siRNA, followed by stimulation with ATP, MSU, nigericin, or poly(dA:dT). Two independent FAK siRNA are indicated as FAK#1 and FAK#2. The western blot is a representative of three independent experiments.

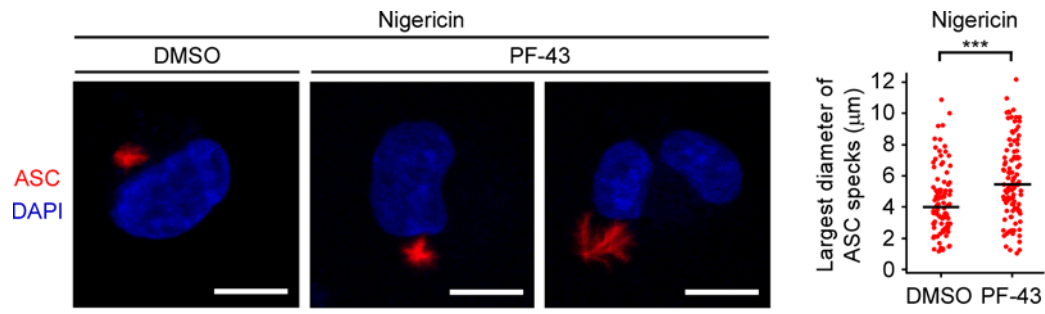

**Supplementary Figure S3. Inhibition of condensed ASC specks by PF-431396.** Representative images of ASC-mCherry-expressing THP-1 cells stimulated with nigericin in the presence or absence of PF-431396 (PF-43) for 1 h. Measurement of the ASC speck diameter was shown in right panel. The numbers of specks measured were 100 and 103 and the median speck size as indicated. Nuclei were stained with DAPI. Scale bars, 10 mm. \*\*\* $P < 0.001$  (one-way analysis of variance).

**Table S1.** Prediction of kinase-specific phosphorylation at ASC Tyr146

| Protein kinase match | Human Kinase Short Name | Human UniProt. ID | Kinase Predictor V2 Score |
|----------------------|-------------------------|-------------------|---------------------------|
| Kinase 1:            | PYK2 (PTK2B)            | Q14289            | 463                       |
| Kinase 2:            | FAK                     | Q05397            | 463                       |
| Kinase 3:            | BRK                     | Q13882            | 457                       |
| Kinase 4:            | MET (HGF Receptor)      | P08581            | 457                       |
| Kinase 5:            | ZAP70                   | P43403            | 455                       |
| Kinase 6:            | CTK (MATK)              | P42679            | 448                       |
| Kinase 7:            | AXL                     | P30530            | 442                       |
| Kinase 8:            | FER                     | P16591            | 442                       |
| Kinase 9:            | FYN                     | P06241            | 440                       |
| Kinase 10:           | SYK                     | P43405            | 438                       |
| Kinase 11:           | KIT                     | P10721            | 434                       |
| Kinase 12:           | MER (MERTK)             | Q12866            | 434                       |
| Kinase 13:           | YES1                    | P07947            | 434                       |
| Kinase 14:           | FGFR1                   | P11362            | 432                       |
| Kinase 15:           | SRC                     | P12931            | 428                       |
| Kinase 16:           | CSK                     | P41240            | 427                       |
| Kinase 17:           | HCK                     | P08631            | 426                       |
| Kinase 18:           | ERBB3                   | P21860            | 424                       |
| Kinase 19:           | TYRO3                   | Q06418            | 421                       |
| Kinase 20:           | ERBB2                   | P04626            | 421                       |
| Kinase 21:           | PDGFRA                  | P16234            | 420                       |
| Kinase 22:           | TEC                     | P42680            | 418                       |
| Kinase 23:           | FGFR4                   | P22455            | 417                       |
| Kinase 24:           | ERBB4                   | Q15303            | 417                       |
| Kinase 25:           | ABL                     | P00519            | 414                       |
| Kinase 26:           | FGFR2                   | P21802            | 413                       |
| Kinase 27:           | FGFR3                   | P22607            | 413                       |
| Kinase 28:           | ARG (ABL2)              | P42684            | 413                       |
| Kinase 29:           | FRK                     | P42685            | 412                       |
| Kinase 30:           | FES                     | P07332            | 412                       |
| Kinase 31:           | FGR                     | P09769            | 409                       |
| Kinase 32:           | FLT1                    | P17948            | 407                       |
| Kinase 33:           | LYN                     | P07948            | 406                       |
| Kinase 34:           | FMS (CSF1R)             | P07333            | 405                       |
| Kinase 35:           | RON                     | Q04912            | 405                       |
| Kinase 36:           | EGFR                    | P00533            | 405                       |
| Kinase 37:           | PDGFRB                  | P09619            | 405                       |

|            |               |        |     |
|------------|---------------|--------|-----|
| Kinase 38: | FLT3          | P36888 | 404 |
| Kinase 39: | TXK           | P42681 | 403 |
| Kinase 40: | SRM (SRMS)    | Q9H3Y6 | 399 |
| Kinase 41: | BMX           | P51813 | 398 |
| Kinase 42: | RET           | P07949 | 398 |
| Kinase 43: | LCK           | P06239 | 397 |
| Kinase 44: | BLK           | P51451 | 395 |
| Kinase 45: | ALK           | Q9UM73 | 394 |
| Kinase 46: | Flt4 (VEGFR3) | P35918 | 394 |
| Kinase 47: | ITK           | Q08881 | 391 |
| Kinase 48: | LTK           | P29376 | 385 |
| Kinase 49: | KDR           | P35968 | 375 |
| Kinase 50: | TIE2 (TEK)    | Q02763 | 363 |

---

The top 50 human protein kinases that are likely to phosphorylate ASC Tyr146 as determined with PhosphoNET (<http://www.phosphonet.ca/>) based on Kinase Predictor V2 Score. The scores are provided by using kinase substrate prediction algorithm developed at Kinexus.

---
